# Supplementary material
Source: HighWire-hosted journal article supplement (https://svn.smart01.highwire.org/content/svn-2019-000324)
Supplement: inline-supplementary-material-1 [file inline-supplementary-material-1.pdf]

**Appendix 1**

1. What is your age (yrs old)?
  - 0-20
  - 21-40
  - 41-60
  - >60
2. What is your gender
  - Male
  - Female
3. Your academic credential
  - Under high school
  - College or secondary school or technical school (non-medical class)
  - Bachelor, Master or PhD (non-medical class)
  - College or secondary school or technical school (medical)
  - Bachelor, Master or PhD (Medical)
4. Your present or previous career is
  - Neurologist
  - Non-neurology Physician
  - Staff in medical system except doctor
  - Non-medical system personnel
5. Your province or autonomous region is?
6. Are you in the city or in the countryside?
  - City
  - Countryside
7. In the knowledge of the rapid identification of these strokes that you know, for the Chinese people, which one is the easiest to remember?
  - FAST (Face, Arm, Speech, Time)
  - Stroke 120
  - Act Now
  - Stroke hero
  - Do not know
  - Other (please specify)
8. Do you know that ischemic stroke (cerebral infarction, or cerebral infarction) can be thrombolytic therapy?
  - know
  - Do not know, want to know
  - Other (please specify)
9. Do you know that ischemic stroke (cerebral infarction, or cerebral infarction) could be given thrombolytic therapy within 4.5 hours?
  - Know
  - Do not know
10. If you or your family or people around you have a stroke, will first choose to which hospital?
  - The nearest hospital with a stroke center
  - Public tertiary hospital
  - The nearest hospital
  - Any hospital
11. If the hospital to provide thrombolytic therapy, do you think you need to sign informed consent?

Yes, it is necessary  
No, it is not necessary  
Physician's decision if no one available for consent  
Do not know  
Other (please specify)
